# Supplementary material for: Predictive Value of Lymphocyte to Monocyte Count Ratio on Complete Occlusion of Infarct-Related Arteries in Patients with Non-ST Segment Elevation Myocardial Infarction
Source: Research Square preprint supplement (doi:10.21203/rs.3.rs-878028/v1), 2021-09-24
Supplement: Supplementary file 1 [file be0cf7408b027eaa620f3b13.xlsx]

## Sheet: Table1
Variables	All（103）	CO group（55）	IO group（48）	t/X²	P
Age (y)	58.3±13.2	57.1±13.5	59.6±12.9	0.963	0.338
Male gender (%)	86（83.5）	48（87.3）	38（79.2）	1.222	0..269
BMI (kg/m²)	26.0878±3.28968	26.2461±3.0604	25.9064±3.55838	0.521	0.604
Weight（Kg）	73.558±10.0682	74.234±9.9067	72.782±10.2995	0.728	0.468
Height（cm）	167.928±6.9733	168.188±7.4386	167.63±6.4643	0.404	0.687
Shock index	0.6377±0.14322	0.6658±0.15199	0.6055±0.12647	2.17	0.032
Heart rate（beat/min）	78.881±14.1595	80.832±12.8711	76.646±15.3366	1.506	0.135
SBP（mmHg）	126.415±21.6817	124.596±21.933	128.5±21.4288	0.911	0.365
DBP（mmHg）	78.197±16.0513	78.515±15.6034	77.833±16.7082	0.214	0.831
Coronary risk factors Diabetes mellitus	18（17.5）	12（21.8）	6（12.5）	1.543	0.214
Hypertension	50（48.5）	27（49.1）	23（47.9）	0.014	0.905
Previous myocardial infarction	14（13.6）	8（14.5）	6（12.5）	0.091	0.763
Smoking	60（58.3）	36（65.5）	24（50.0）	2.517	0.113
LMR	4.015±1.509	3.475±1.211	4.634±1.588	4.12	<0.001
Lymphocyte count（10^9/L）	1.693±0.803	1.551±0.749	1.856±0.840	1.951	0.054
Monocyte count（10^9/L）	0.450±0.189	0.471±0.199	0.427±0.175	1.185	0.239
Glycosylated hemoglobin（%）	6.351±1.150	6.474±1.423	6.210±0.711	1.213	0.228
Hemoglobin（g/L）	144.476±17.024	146.327±18.348	142.354±15.284	1.184	0.239
C-reactive protein（mg/L）	5.036±9.359	5.267±12.029	4.772±4.872	0.267	0.79
Platelet count（10^9/L）	202.922±50.356	208.891±51.351	196.083±48.827	1.292	0.199
APTT（S）	29.829±4.854	28.744±2.912	31.072±6.199	2.383	0.02
INR	1.078±0.152	1.063±0.150	1.094±0.154	1.052	0.295
Creatinine（umol/L）	74.710±69.567	67.919±20.112	82.491±99.611	1.061	0.291
Uric Acid（umol/L）	330.847±82.729	336.321±91.370	324.574±72.015	0.717	0.475
AST（U/L）	77.948±87.975	83.866±89.400	71.167±86.752	0.729	0.468
LDH（U/L）	654.092±428.949	705.863±443.993	594.771±407.546	1.316	0.191
CKMB（U/L）	71.225±87.603	82.477±102.507	58.331±65.300	1.402	0.164
FT3（pmol/L）	3.859±0.951	3.772±0.984	3.960±0.911	1.002	0.319
FT4（pmol/L）	15.025±2.952	15.047±2.961	15.001±2.973	0.079	0.937

## Sheet: Table2
	Univariate analysis			Multivariate analysis
	OR (95% CI)	P		OR (95% CI)	P
Shock index	0.037(0.002-0.855)	0.04
LMR	1.802（1.311-2.477）	<0.001		1.833（1.318-2.550）	<0.001
APTT	1.147(1.022-1.287)	0.02		1.155（1.018-1.309）	0.025
